# Supplementary material
Source: PubMed Central journal article supplement (PMC6374116)

## Supplemental Data for

# Structural and computational basis for potent inhibition of glutamate carboxypeptidase II by carbamate-based inhibitors

Cyril Barinka,<sup>1\*</sup> Zora Novakova,<sup>1</sup> Niyada Hin,<sup>2</sup> Daniel Bím,<sup>5</sup> Dana V Ferraris,<sup>6</sup> Bridget Duvall,<sup>2</sup> Gabriel Kabarriti,<sup>2</sup> Reiji Tsukamoto,<sup>2</sup> Milos Budesinsky,<sup>5</sup> Lucia Motlova,<sup>1</sup> Camilo Rojas,<sup>2,4</sup> Barbara S. Slusher,<sup>2,3</sup> Tibor András Rokob,<sup>7</sup> Lubomír Rulíšek,<sup>5\*</sup> Takashi Tsukamoto,<sup>2,3\*</sup>

<sup>1</sup>Institute of Biotechnology CAS, BIOCEV, Prumyslova 595, 252 50 Vestec, Czech Republic

<sup>2</sup>Johns Hopkins Drug Discovery, <sup>3</sup>Department of Neurology, and <sup>4</sup>Department of Molecular and Comparative Pathobiology, Johns Hopkins University, Baltimore, Maryland 21205, United States

<sup>5</sup>Institute of Organic Chemistry and Biochemistry, Czech Academy of Sciences, Flemingovo nám. 2, Prague 6, 166 10, Czech Republic

<sup>6</sup>McDaniel College, 2 College Hill, Westminster, Maryland 21157, United States

<sup>7</sup>Institute of Organic Chemistry, Research Centre for Natural Sciences, Hungarian Academy of Sciences, 1117 Budapest, Magyar Tudósok körútja 2, Hungary

\*Address correspondence to:

T. T.: Tel: +1-410-614-0982; e-mail: [ttskuamoto@jhmi.edu](mailto:ttskuamoto@jhmi.edu)

C. B.: Tel: +420-325-873-777; e-mail: [cyril.barinka@ibt.cas.cz](mailto:cyril.barinka@ibt.cas.cz)

L. R. Tel +420-220-183-263; e-mail: [lubomir.rulisek@uochb.cas.cz](mailto:lubomir.rulisek@uochb.cas.cz)

†The author is no longer affiliated with the listed institution.

**Table S1** Primary energy data: molecular energies in gas-phase, E(el), solvation energies, G(solv) and thermal corrections.

| Compound ID        | E(el) [a.u.]              | G(solv) [kcal·mol <sup>-1</sup> ] |             | Thermal corrections [kJ·mol <sup>-1</sup> ] | Free energy [a.u.] |             | Free energy w/o thermal corrections [a.u.] |             |
|--------------------|---------------------------|-----------------------------------|-------------|---------------------------------------------|--------------------|-------------|--------------------------------------------|-------------|
|                    | aug-cc-pVDZ/dlpno-ccsd(t) | water                             | octanol     |                                             | water              | octanol     | water                                      | octanol     |
| <b>enzyme_geom</b> |                           |                                   |             |                                             |                    |             |                                            |             |
| <b>ZJ-43</b>       | -1101.030638              | -380.5771607                      | -332.192925 | x                                           | x                  | x           | -1101.63713                                | -1101.56002 |
| <b>5</b>           | -1120.873229              | -378.0424948                      | -330.589002 | x                                           | x                  | x           | -1121.47568                                | -1121.40006 |
| <b>7</b>           | -1120.877541              | -376.0584747                      | -329.46543  | x                                           | x                  | x           | -1121.47683                                | -1121.40258 |
| <b>local_min</b>   |                           |                                   |             |                                             |                    |             |                                            |             |
| <b>ZJ-43</b>       | -1101.064086              | -360.6436077                      | -318.508895 | 623.809                                     | -1101.40121        | -1101.33407 | -1101.63881                                | -1101.57166 |
| <b>5</b>           | -1120.894983              | -366.4478244                      | -321.317768 | 596.758                                     | -1121.25166        | -1121.17974 | -1121.47895                                | -1121.40704 |
| <b>7</b>           | -1120.897908              | -366.5066557                      | -322.604834 | 596.78                                      | -1121.25467        | -1121.18471 | -1121.48197                                | -1121.41201 |
| <b>global_min</b>  |                           |                                   |             |                                             |                    |             |                                            |             |
| <b>ZJ-43</b>       | -1101.045102              | -377.7762178                      | x           | 632.525                                     | -1101.40621        | x           | x                                          | x           |
| <b>5</b>           | -1120.871343              | -385.9885252                      | x           | 594.17                                      | -1121.26015        | x           | x                                          | x           |
| <b>7</b>           | -1120.906017              | -363.3795128                      | x           | 593.544                                     | -1121.25903        | x           | x                                          | x           |

**Table S2**  $^1\text{H}$  and  $^{13}\text{C}$  NMR data of compounds **ZJ-43**, **5**, and **7**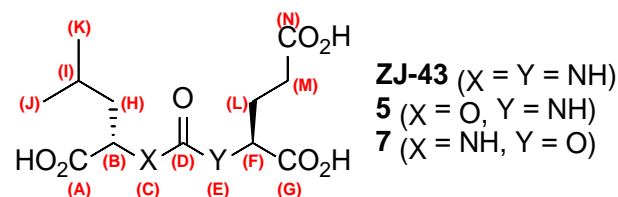

|                                    | <b>ZJ-43</b><br>X = NH, Y = NH                                                                                      | <b>5</b><br>X = O, Y = NH                                                                                           | <b>7</b><br>X = NH, Y = O                                                                                         |
|------------------------------------|---------------------------------------------------------------------------------------------------------------------|---------------------------------------------------------------------------------------------------------------------|-------------------------------------------------------------------------------------------------------------------|
| $^1\text{H}$ NMR (DMSO- $d_6$ )    |                                                                                                                     |                                                                                                                     |                                                                                                                   |
| A                                  | 12.42 br                                                                                                            | 12.58 br                                                                                                            | 12.56 br                                                                                                          |
| B                                  | 4.075 ddd, $J(\text{B,C}) = 8.3$ ; $J(\text{B,H1}) = 10.4$ ;<br>$J(\text{B,H2}) = 4.6$                              | 4.73 dd, $J(\text{B,H1}) = 10.4$ ; $J(\text{B,H2}) = 4.6$                                                           | 3.93 ddd, $J(\text{B,C}) = 8.2$ ; $J(\text{B,H1}) = 10.4$ ;<br>$J(\text{B,H2}) = 4.6$                             |
| C                                  | 6.27 d, $J(\text{C,B}) = 8.3$                                                                                       | --                                                                                                                  | 7.62 d, $J(\text{C,B}) = 8.2$                                                                                     |
| E                                  | 6.255 d, $J(\text{E,F}) = 8.4$                                                                                      | 7.61 d, $J(\text{E,F}) = 8.1$                                                                                       | --                                                                                                                |
| F                                  | 4.08 td, $J(\text{F,E}) = 8.4$ ; $J(\text{F,L1}) = 5.3$ ;<br>$J(\text{F,L2}) = 8.6$                                 | 3.95 ddd, $J(\text{F,E}) = 8.1$ ; $J(\text{F,L1}) = 5.0$ ;<br>$J(\text{F,L2}) = 9.4$                                | 4.73 dd, $J(\text{F,L1}) = 4.9$ ; $J(\text{F,L2}) = 8.2$                                                          |
| G                                  | 12.42 br                                                                                                            | 12.58 br                                                                                                            | 12.56 br                                                                                                          |
| H1                                 | 1.46 dd<br>( $\text{H1,B} = 8.3$ ; $\text{H1H2} = 13.6$ ; $\text{H1,I} = 5.6$ )                                     | 1.64 ddd<br>( $\text{H1,B} = 9.8$ ; $\text{H1H2} = 14.0$ ; $\text{H1,I} = 4.7$ )                                    | 1.53 ddd,<br>( $\text{H1,B} = 10.4$ ; $\text{H1H2} = 13.6$ ; $\text{H1,I} = 5.0$ )                                |
| H2                                 | 1.40 ddd, $J(\text{H2,B}) = 5.6$ ; $J(\text{H2H1}) = 13.6$ ;<br>$J(\text{H2,I}) = 9.5$                              | 1.54 ddd, $J(\text{H2,B}) = 4.1$ ; $J(\text{H2H1}) = 14.0$ ;<br>$J(\text{H2,I}) = 8.8$                              | 1.45 ddd, $J(\text{H2,B}) = 4.6$ ; $J(\text{H2H1}) = 13.6$ ;<br>$J(\text{H2,I}) = 9.1$                            |
| I                                  | 1.64 m, $J(\text{I,H1}) = 5.2$ ; $J(\text{I,H2}) = 9.5$ ;<br>$J(\text{I,J}) = 6.6$ ; $J(\text{I,K}) = 6.6$          | 1.735 m, $J(\text{I,H1}) = 4.7$ ; $J(\text{I,H2}) = 8.8$ ;<br>$J(\text{I,J}) = 6.6$ ; $J(\text{I,K}) = 6.6$         | 1.67 m, $J(\text{I,H1}) = 5.0$ ; $J(\text{I,H2}) = 9.1$ ;<br>$J(\text{I,J}) = 6.6$ ; $J(\text{I,K}) = 6.6$        |
| J                                  | 0.885 d, $J(\text{J,I}) = 6.6$                                                                                      | 0.91 d, $J(\text{J,I}) = 6.6$                                                                                       | 0.885 d, $J(\text{J,I}) = 6.6$                                                                                    |
| K                                  | 0.855 d, $J(\text{K,I}) = 6.6$                                                                                      | 0.89 d, $J(\text{K,I}) = 6.6$                                                                                       | 0.84 d, $J(\text{K,I}) = 6.6$                                                                                     |
| L1                                 | 1.90 dddd, $J(\text{L1,F}) = 5.3$ ; $J(\text{L1,L2}) = 13.8$ ;<br>$J(\text{L1,M1}) = 6.7$ ; $J(\text{L1,M2}) = 9.0$ | 1.94 dddd, $J(\text{L1,F}) = 5.0$ ; $J(\text{L1,L2}) = 13.9$ ;<br>$J(\text{L1,M1}) = 7.1$ ; $J(\text{L1,M2}) = 8.4$ | 2.00 m, $J(\text{L1,F}) = 4.9$ ; $J(\text{L1,L2}) = 14.2$ ;<br>$J(\text{L1,M1}) = 6.7$ ; $J(\text{L1,M2}) = 9.0$  |
| L2                                 | 1.71 dddd, $J(\text{L2,F}) = 8.6$ ; $J(\text{L2,L1}) = 13.8$ ;<br>$J(\text{L2,M1}) = 9.0$ ; $J(\text{L2,M2}) = 6.0$ | 1.75 dddd, $J(\text{L2,F}) = 9.4$ ; $J(\text{L2,L1}) = 13.9$ ;<br>$J(\text{L2,M1}) = 7.1$ ; $J(\text{L2,M2}) = 8.4$ | 1.875 m, $J(\text{L2,F}) = 8.2$ ; $J(\text{L2,L1}) = 14.2$ ;<br>$J(\text{L2,M1}) = 8.9$ ; $J(\text{L2,M2}) = 5.8$ |
| M1                                 | 2.26 ddd, $J(\text{M1,L1}) = 6.7$ ; $J(\text{M1,L2}) = 9.0$ ;<br>$J(\text{M1,M2}) = 16.5$                           | 2.31 ddd, $J(\text{M1,L1}) = 7.1$ ; $J(\text{M1,L2}) = 7.8$ ;<br>$J(\text{M1,M2}) = 16.8$                           | 2.37 m, $J(\text{M1,L1}) = 6.7$ ; $J(\text{M1,L2}) = 8.9$ ;<br>$J(\text{M1,M2}) = 16.8$                           |
| M2                                 | 2.21 ddd, $J(\text{M2,L1}) = 9.0$ ; $J(\text{M2,L2}) = 6.0$ ;<br>$J(\text{M2,M1}) = 16.5$                           | 2.28 ddd, $J(\text{M2,L1}) = 8.4$ ; $J(\text{M2,L2}) = 6.2$ ;<br>$J(\text{M2,M1}) = 16.8$                           | 2.31 m, $J(\text{M2,L1}) = 9.0$ ; $J(\text{M2,L2}) = 5.8$ ;<br>$J(\text{M2,M1}) = 16.8$                           |
| N                                  | 12.42 br                                                                                                            | 12.58 br                                                                                                            | 12.56 br                                                                                                          |
| $^{13}\text{C}$ NMR (DMSO- $d_6$ ) |                                                                                                                     |                                                                                                                     |                                                                                                                   |
| A                                  | 175.28                                                                                                              | 172.64                                                                                                              | 174.44                                                                                                            |
| B                                  | 51.06                                                                                                               | 70.66                                                                                                               | 52.32                                                                                                             |
| D                                  | 157.50                                                                                                              | 155.92                                                                                                              | 155.73                                                                                                            |
| F                                  | 51.90                                                                                                               | 53.24                                                                                                               | 71.12                                                                                                             |
| G                                  | 174.39                                                                                                              | 173.64                                                                                                              | 171.99                                                                                                            |
| H                                  | 41.36                                                                                                               | 39.70                                                                                                               | 39.94                                                                                                             |
| I                                  | 24.49                                                                                                               | 24.33                                                                                                               | 24.42                                                                                                             |
| J                                  | 23.03                                                                                                               | 23.04                                                                                                               | 23.08                                                                                                             |
| K                                  | 21.87                                                                                                               | 21.66                                                                                                               | 21.39                                                                                                             |
| L                                  | 27.79                                                                                                               | 26.42                                                                                                               | 26.54                                                                                                             |
| M                                  | 30.19                                                                                                               | 30.27                                                                                                               | 29.49                                                                                                             |
| N                                  | 173.97                                                                                                              | 173.97                                                                                                              | 173.72                                                                                                            |

NMR spectra of **ZJ-43**, **5** and **7** were measured on Bruker AVANCE 600 instrument with a cryo-probe ( $^1\text{H}$  at 600 MHz and  $^{13}\text{C}$  at 150.9 MHz frequency) in DMSO- $d_6$  at 25 °C (see below for  $^1\text{H}$  and  $^{13}\text{C}$  spectra). The 2D-H,H-COSY, 2D-H,H-ROESY, 2D-H,C-HSQC and 2D-H,C-HMBC spectra were used for the structural assignment of proton and carbon signals. Chemical shifts are referenced to the solvent signal using relations:  $\delta_{\text{H}}(\text{DMSO}) = 2.50$  ppm and  $\delta_{\text{C}}(\text{DMSO}) = 39.7$  ppm. Very similar values of proton vicinal couplings indicate also very similar conformation properties of three studied inhibitors in solution. General preferred *trans*- arrangement of the amide and carbamate bonds together with large values of  $^3J(\text{N,H}) = 8.1$ – $8.4$  Hz suggest preferred extended conformation of the inhibitor backbone. The observed  $^3J(\text{H}\alpha,\text{H}\beta)$  and  $^3J(\text{H}\beta,\text{H}\gamma)$  are typical for *trans*- and *gauche*- couplings of geminal protons and *trans*-orientation of carbon atoms in both side chains. The 2D-H,H-ROESY spectrum showed only *intra*-residual NOEs contacts. The absence of any *inter*-residual NOE contacts can be explained by preferred extended conformations of backbone and side-chains where average distance between side-chain protons of two residues is above NOE observation range (more than ca 3.5 Å) and some contribution of flexibility of the inhibitor molecules in solution.

$^1\text{H}$  and  $^{13}\text{C}$  spectra of ZJ-43

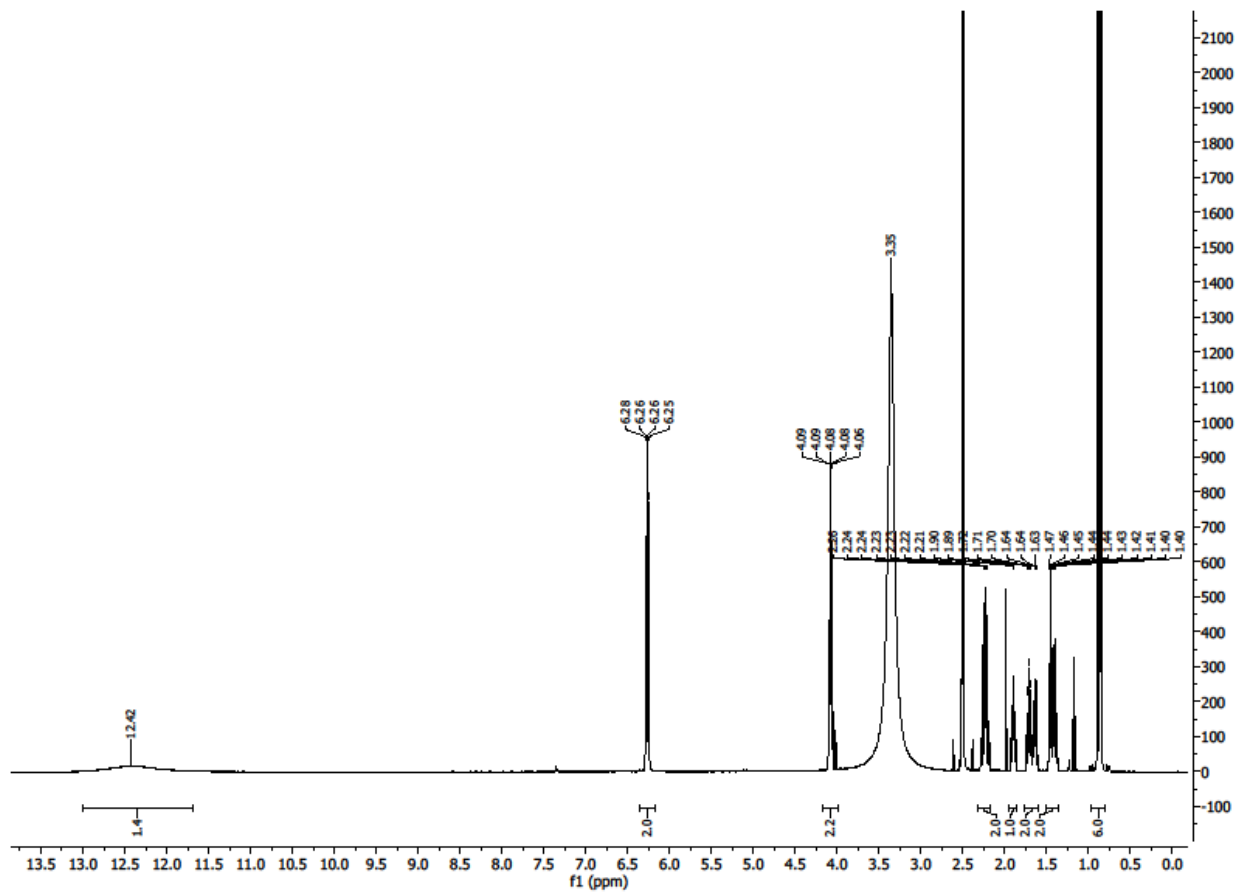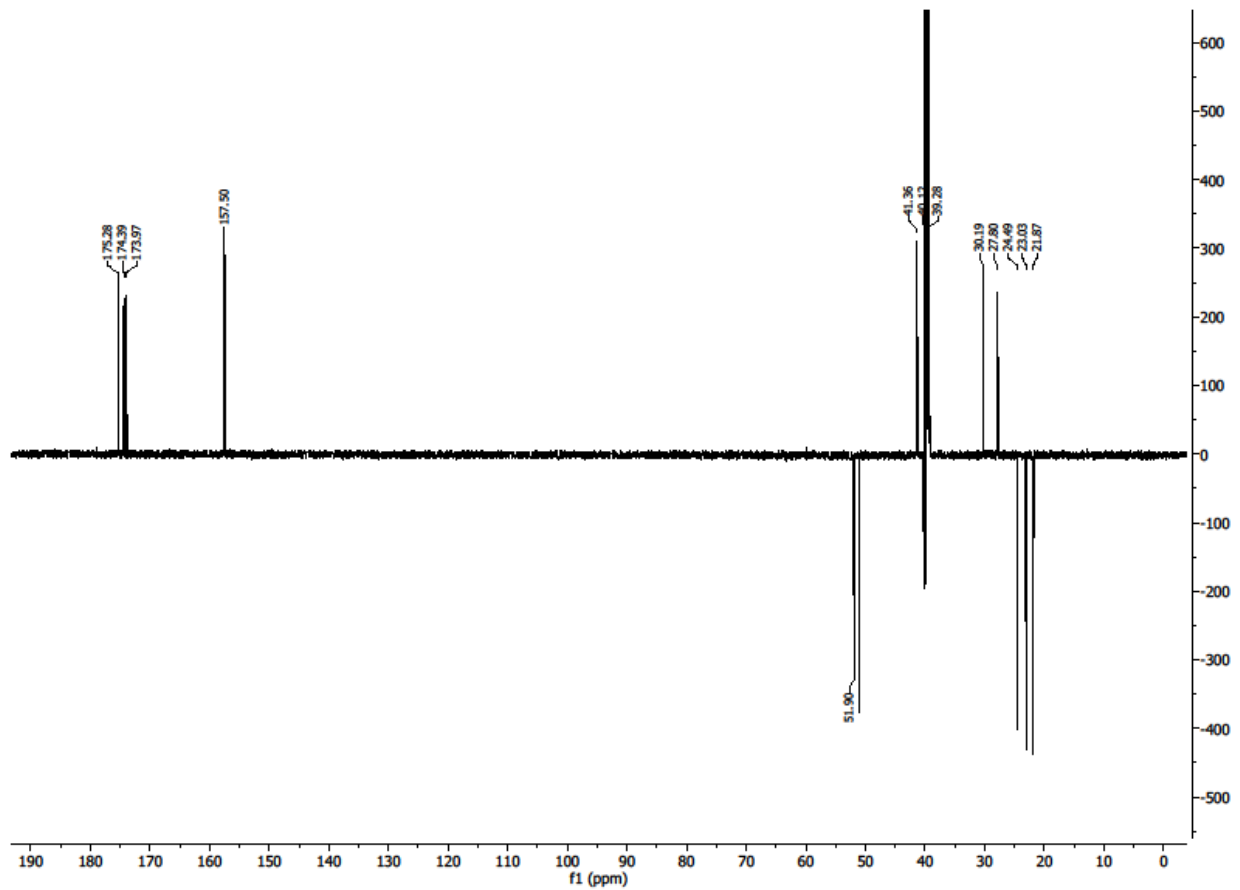

$^1\text{H}$  and  $^{13}\text{C}$  spectra of compound **5**

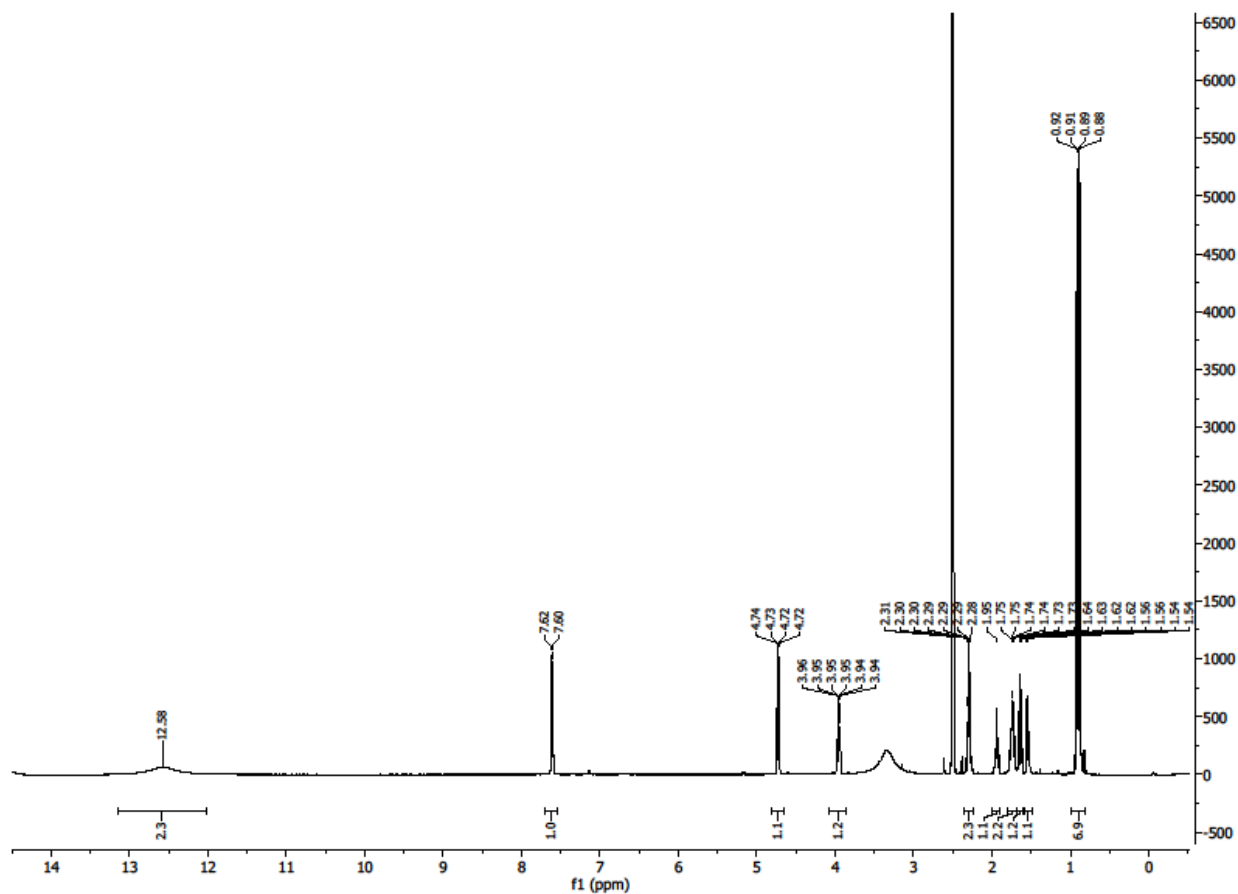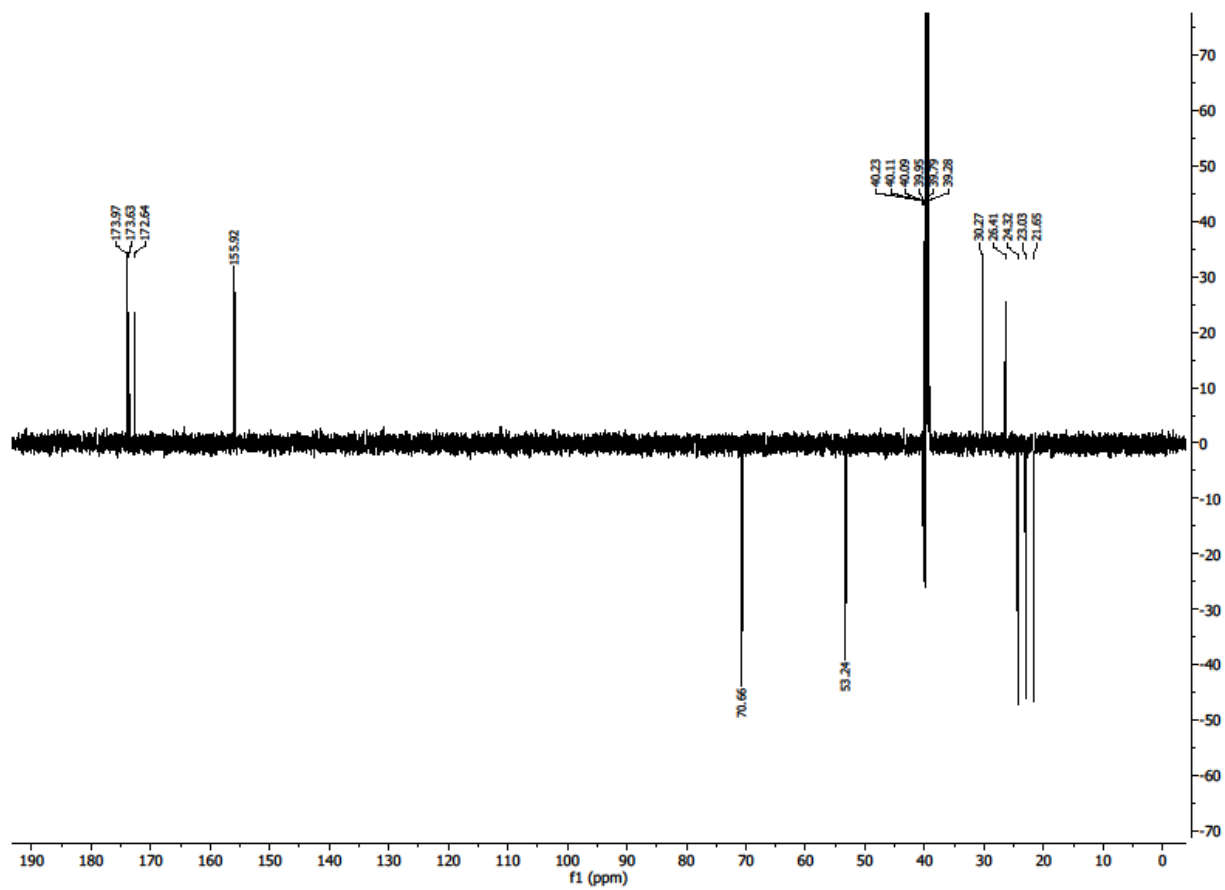

$^1\text{H}$  and  $^{13}\text{C}$  spectra of compound 7

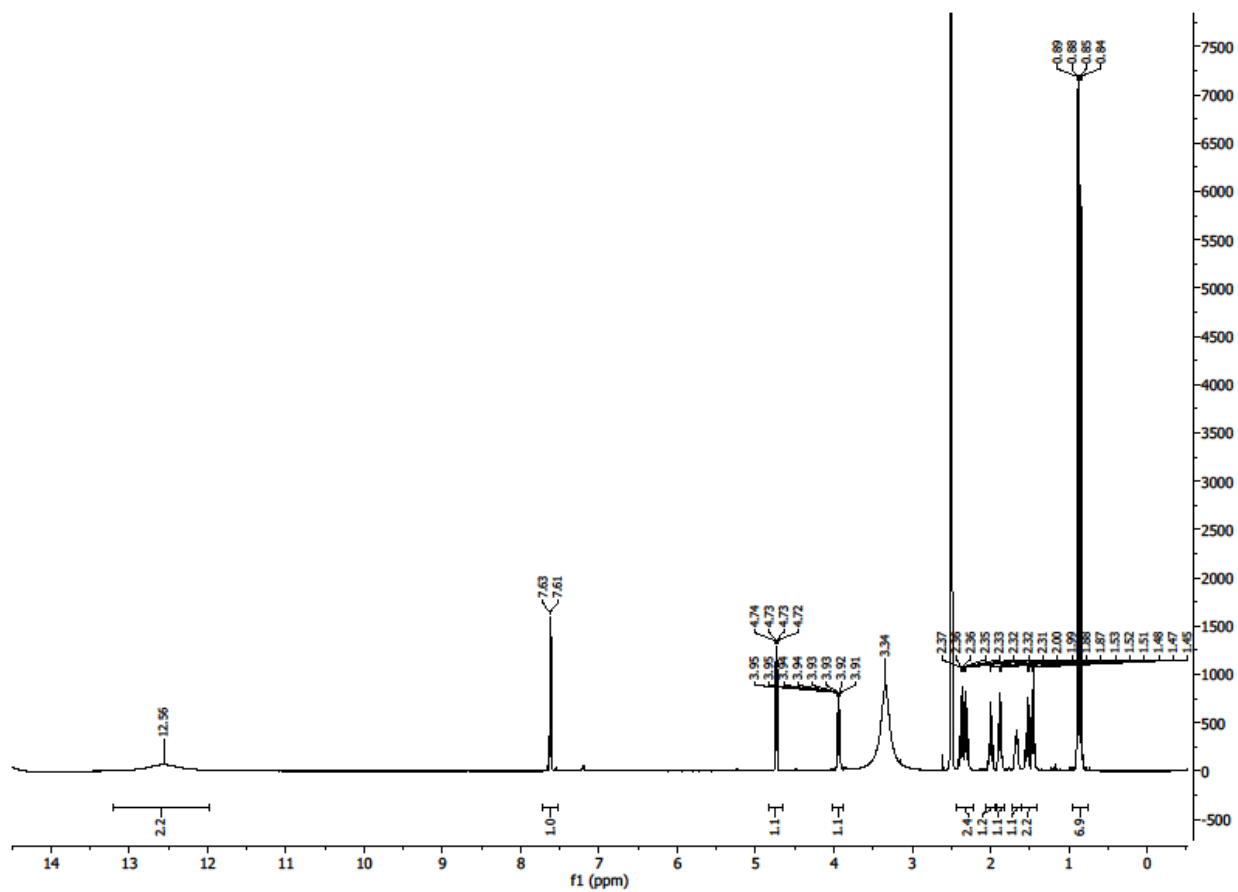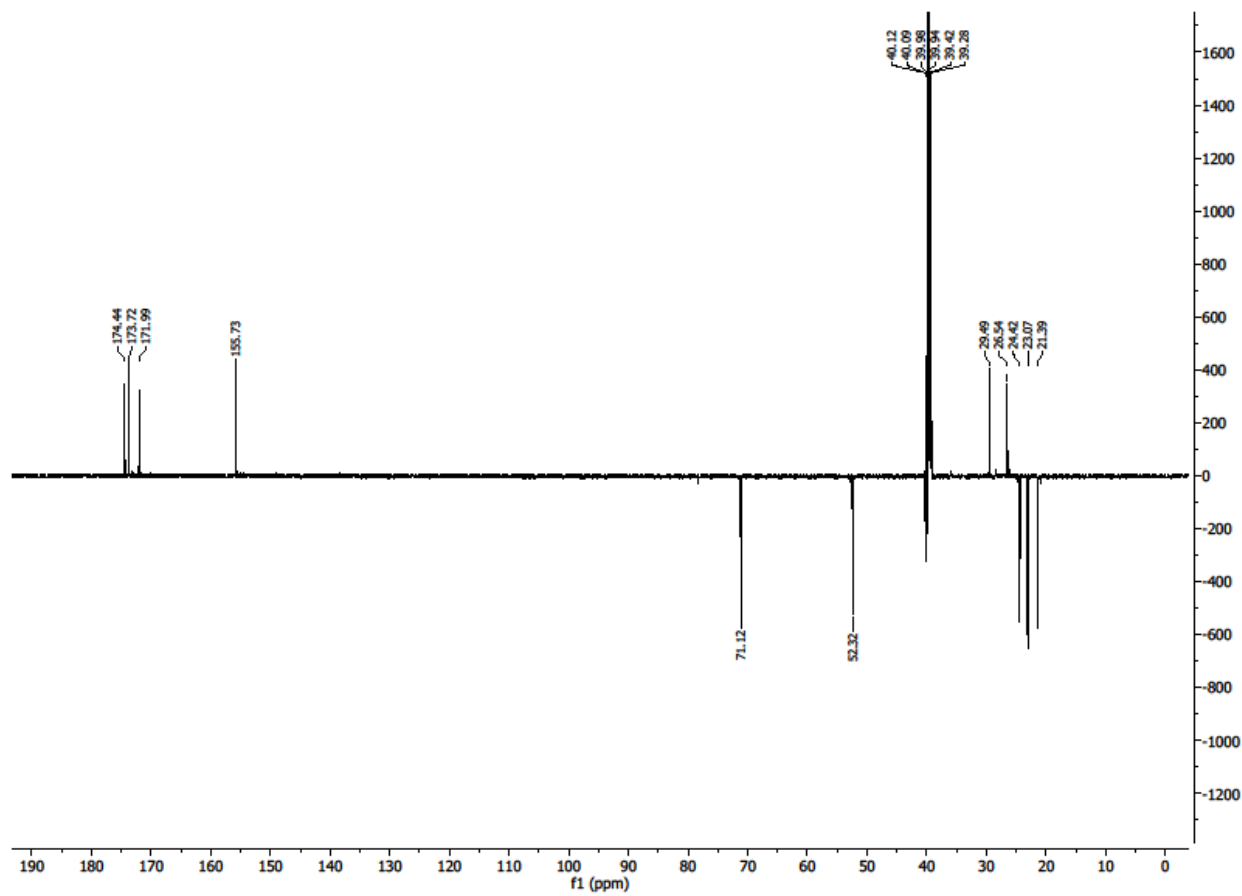

**Table S3**  $^1\text{H}$  spectra of test compounds **4-10**

**Compound 4**

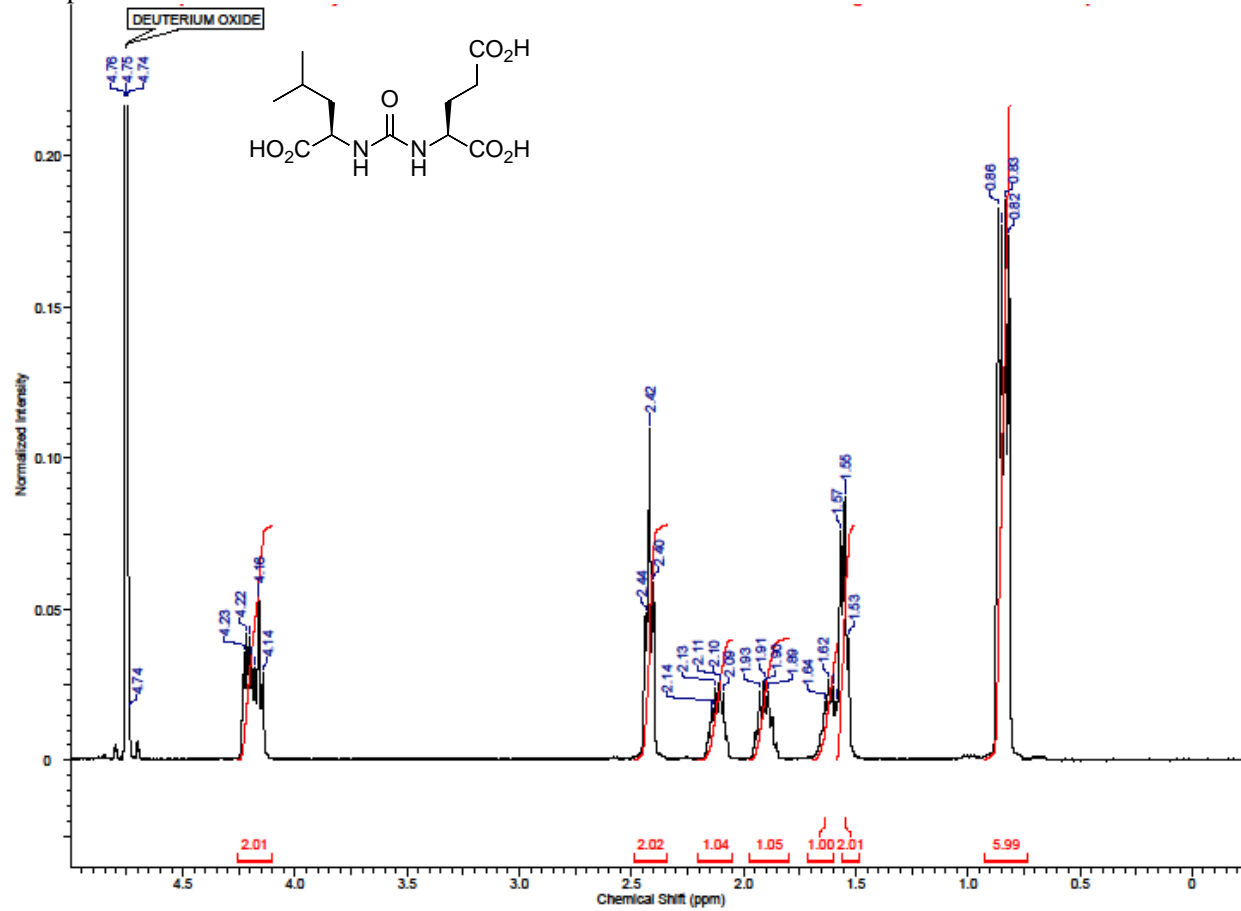

**Compound 5**

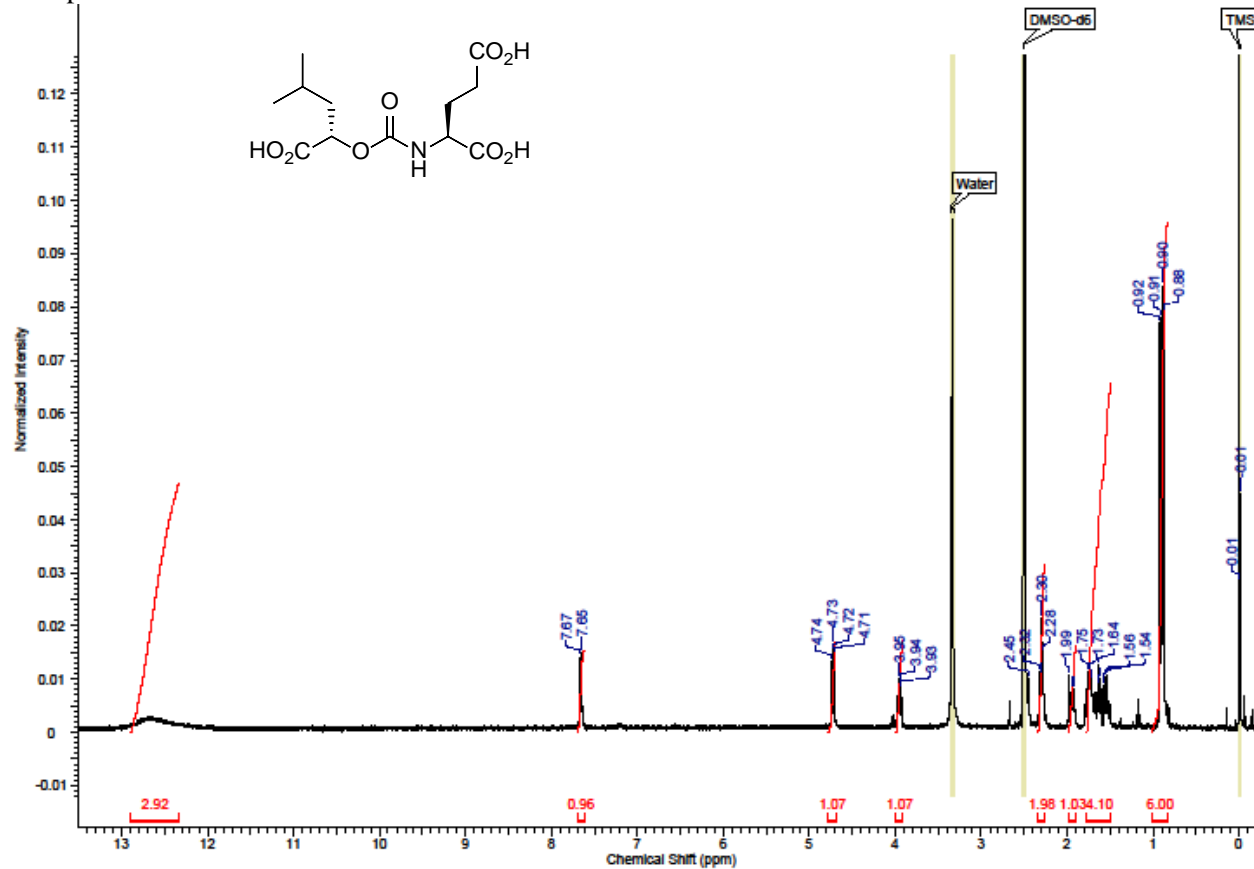

Compound 6

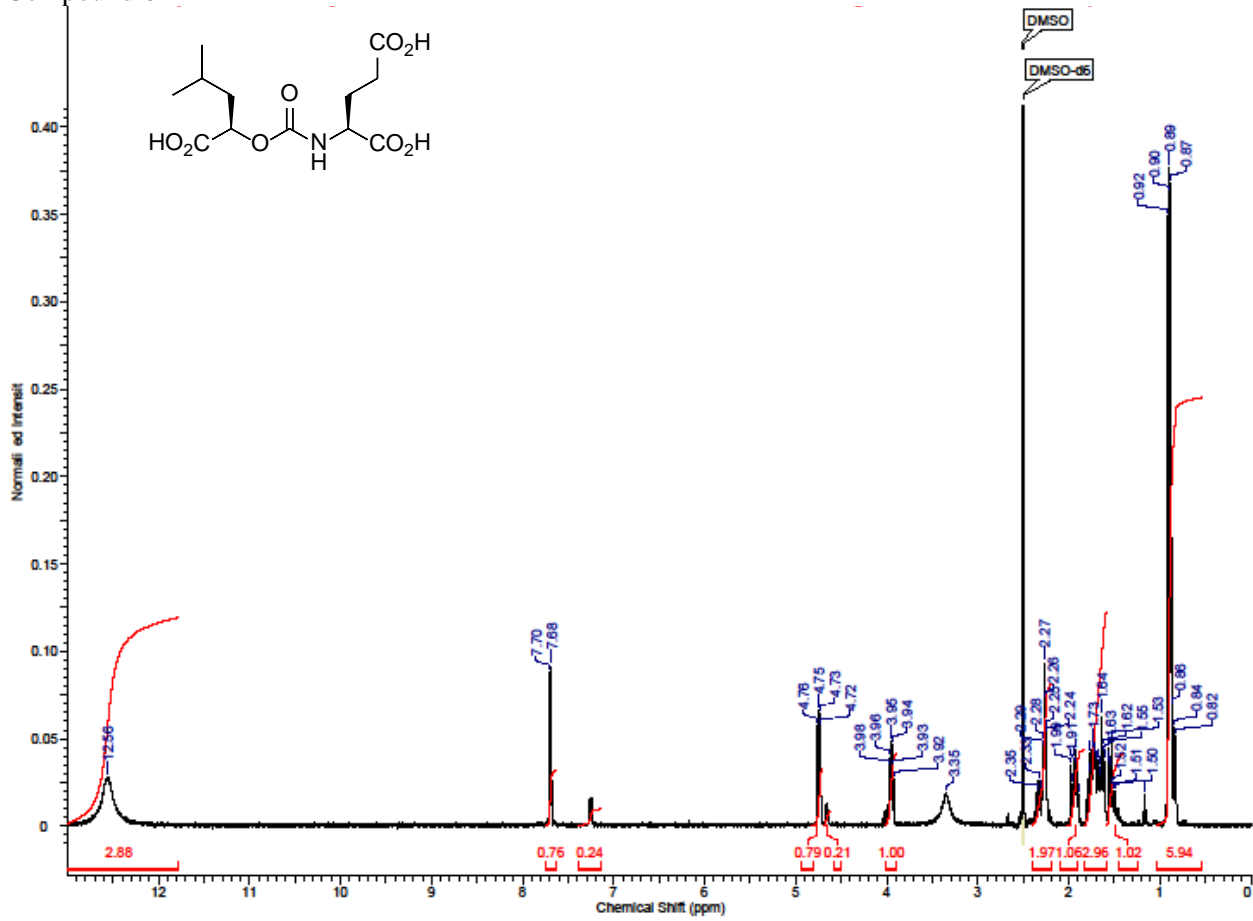

Compound 7

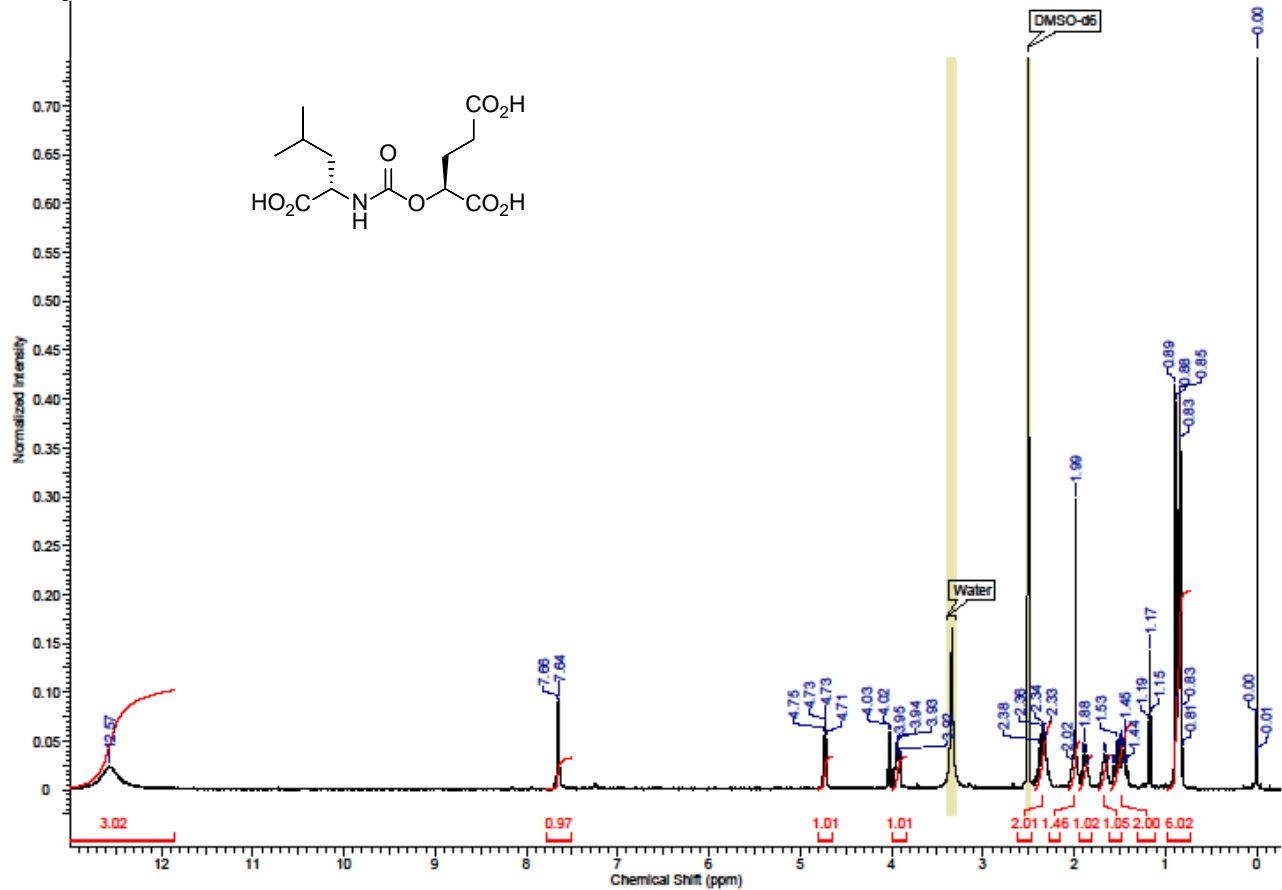



Compound 8

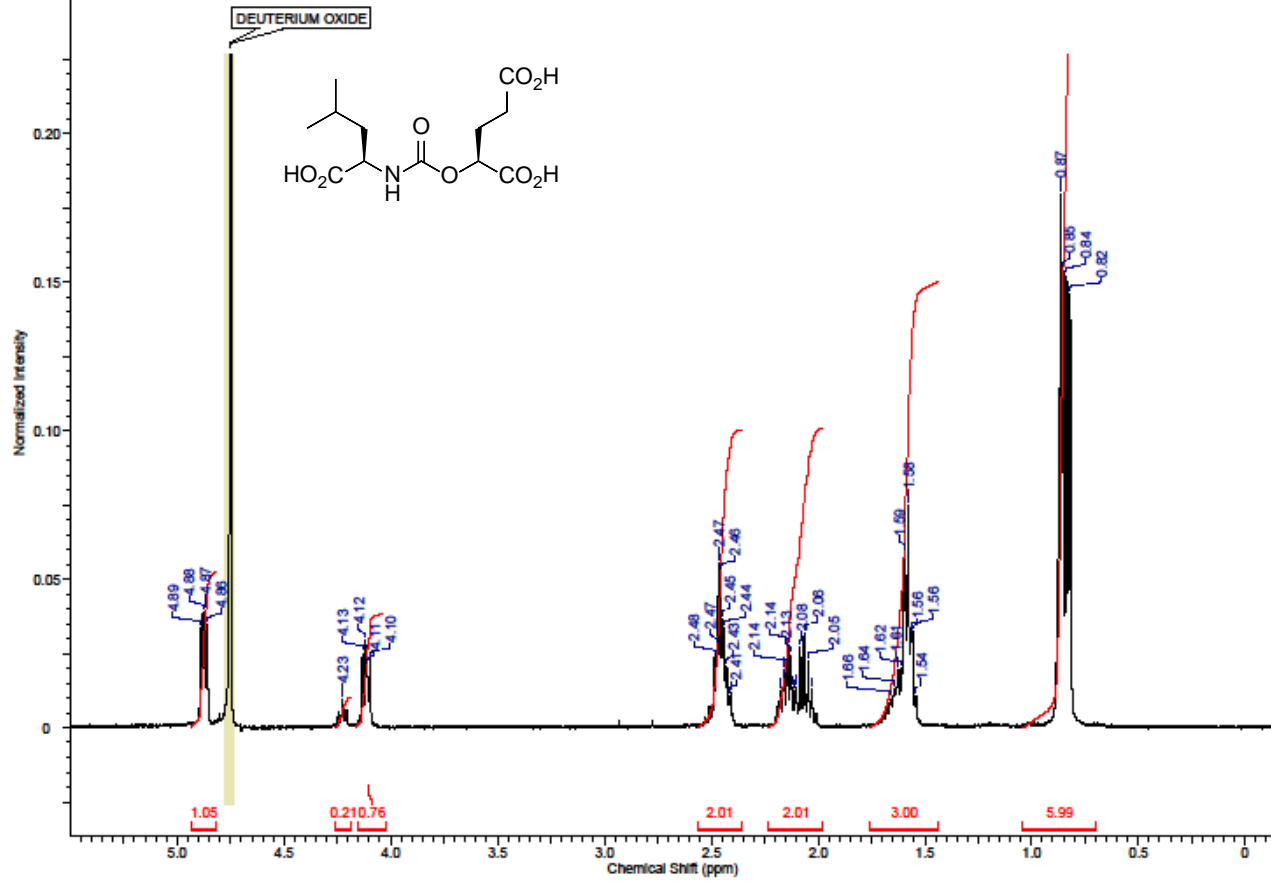

Compound 9

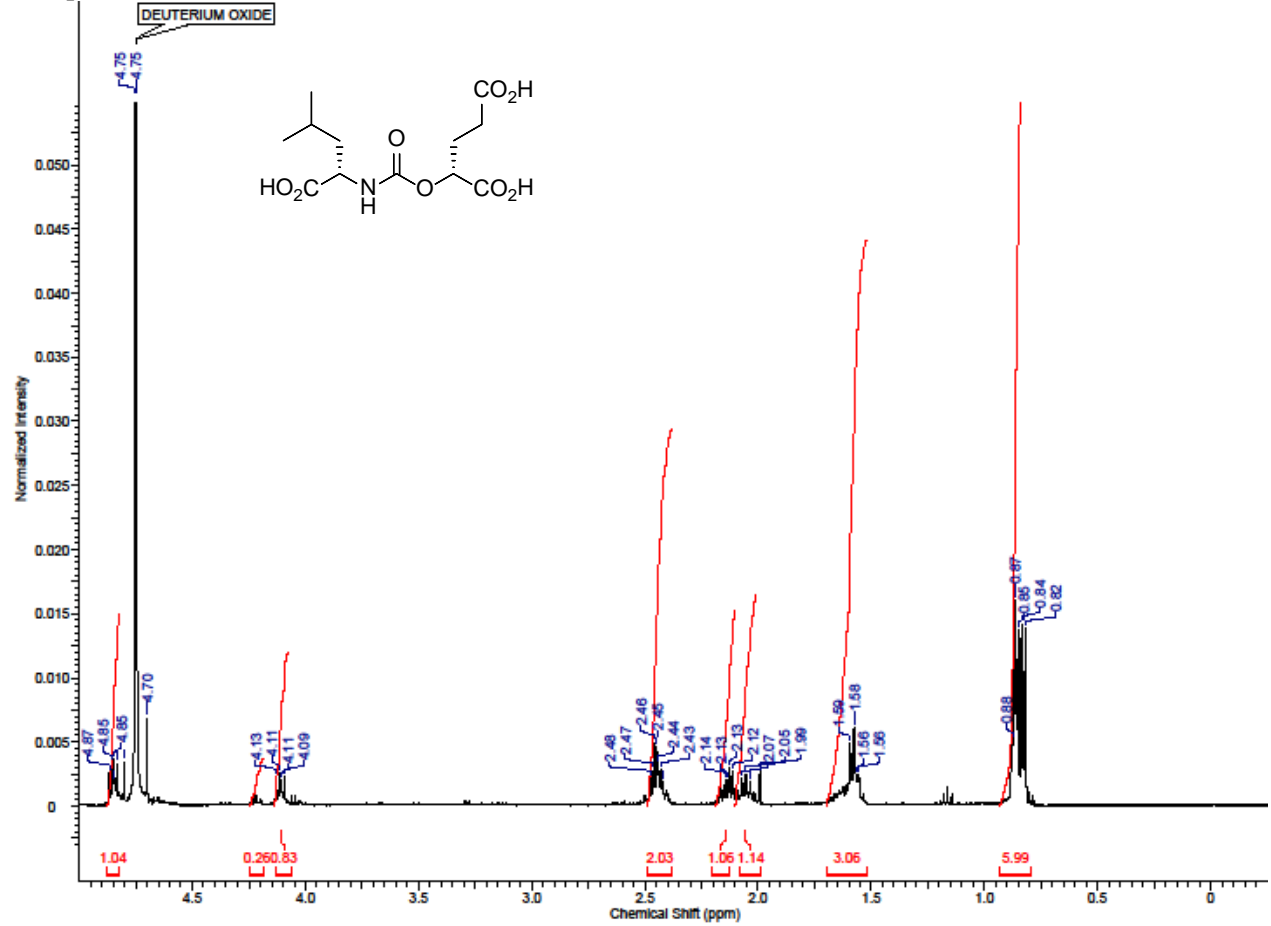

Compound 10

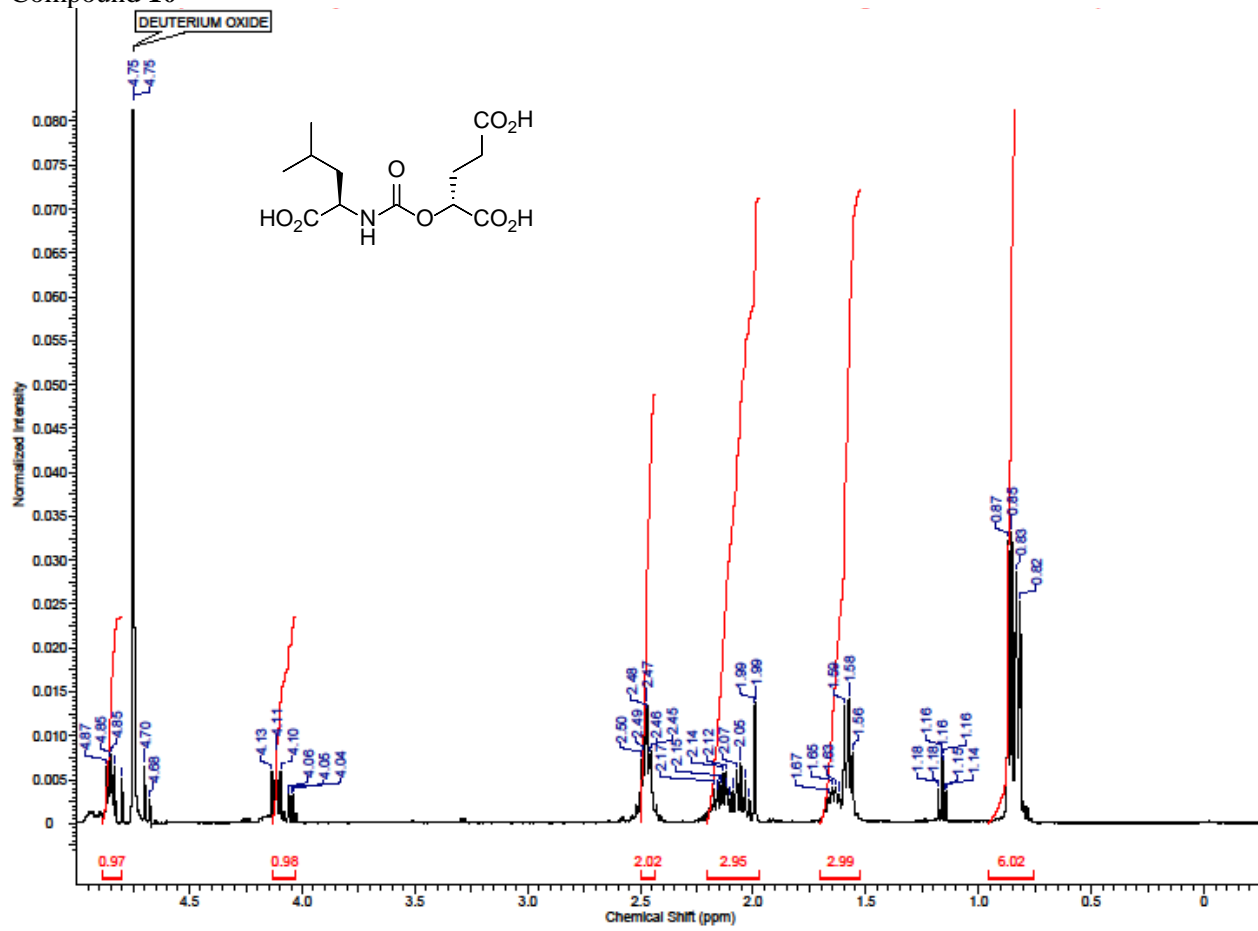

Supplement: NIHMS1516502-supplement-2.pdf [file NIHMS1516502-supplement-2.pdf]
